# Supplementary material for: Coordination complexes constructed from pyrazole–acetamide and pyrazole–quinoxaline: effect of hydrogen bonding on the self-assembly process and antibacterial activity
Source: Royal Society of Chemistry journal article supplement (doi:10.1039/d1ra09027e), 2022-01-01
Supplement: d1ra09027e1.pdf [file d1ra09027e1.pdf]

## SUPPORTING INFORMATION

### **Coordination complexes constructed from pyrazole-acetamide and pyrazole-quinoxaline: Effect of hydrogen bonding on the self-assembly process and antibacterial activity**

Karim Chkirate,<sup>a</sup> Khalid Karrouchi,<sup>b,\*</sup> Hind Chakchak,<sup>c</sup> Joel T. Mague,<sup>d</sup> Smaail Radi,<sup>e</sup> N. N. Adarsh,<sup>f</sup> Weiyang Li,<sup>g</sup> Ahmed Talbaoui,<sup>h</sup> El Mokhtar Essassi,<sup>a</sup> and Yann Garcia<sup>g,\*</sup>

<sup>a</sup> Laboratory of Heterocyclic Organic Chemistry, Department of Chemistry, Faculty of Sciences, Mohamed V University, BP1014, Rabat, 10100, Morocco.

<sup>b</sup> Laboratory of Analytical Chemistry and Bromatology, Faculty of Medicine and Pharmacy, Mohammed V University in Rabat, Morocco.

<sup>c</sup> Unités d'Appui Techniques À la Recherche Scientifique (UATRS), Centre National Pour la Recherche Scientifique et Technique (CNRST), Rabat, 10000, Morocco.

<sup>d</sup> Department of Chemistry, Tulane University, New Orleans, LA 70118, USA.

<sup>e</sup> LCAE, Département de Chimie, Faculté des Sciences, Université Mohamed I, BP 524, 60 000 Oujda, Morocco.

<sup>f</sup> School of Chemical Sciences, Mahatma Gandhi University, Kottayam, 686560, Kerala, India.

<sup>g</sup> Institute of Condensed Matter and Nanosciences, Molecular Chemistry, Materials and Catalysis (IMCN/MOST), Université catholique de Louvain, Place L. Pasteur 1, 1348 Louvain-la-Neuve, Belgium.

<sup>h</sup> Laboratoire de Biologie des Pathologies Humaines, Faculté des Sciences, Université Mohammed V de Rabat, Morocco.

\*Corresponding authors:

[yann.garcia@uclouvain.be](mailto:yann.garcia@uclouvain.be) (Y. Garcia)

[khalid.karrouchi@um5s.net.ma](mailto:khalid.karrouchi@um5s.net.ma) (K. Karrouchi)

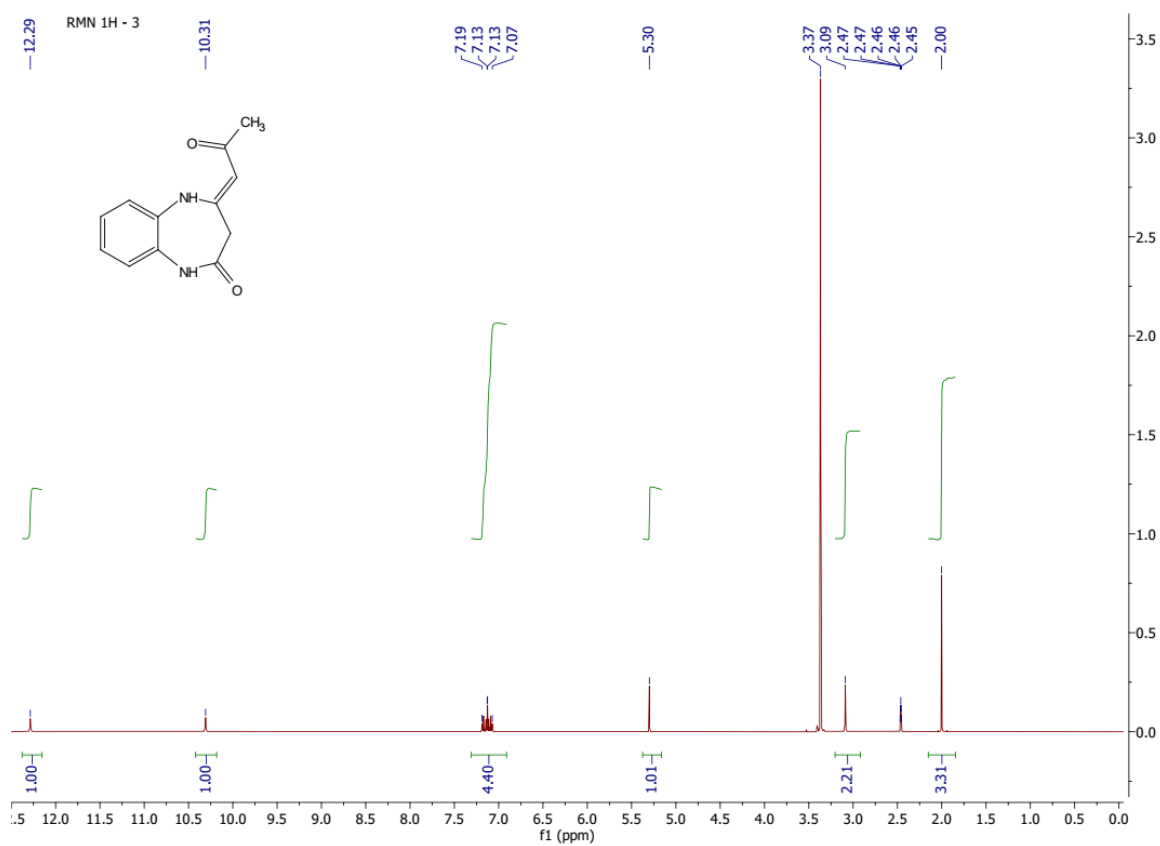

Figure S1.  $^1\text{H}$  NMR spectrum of **3**.

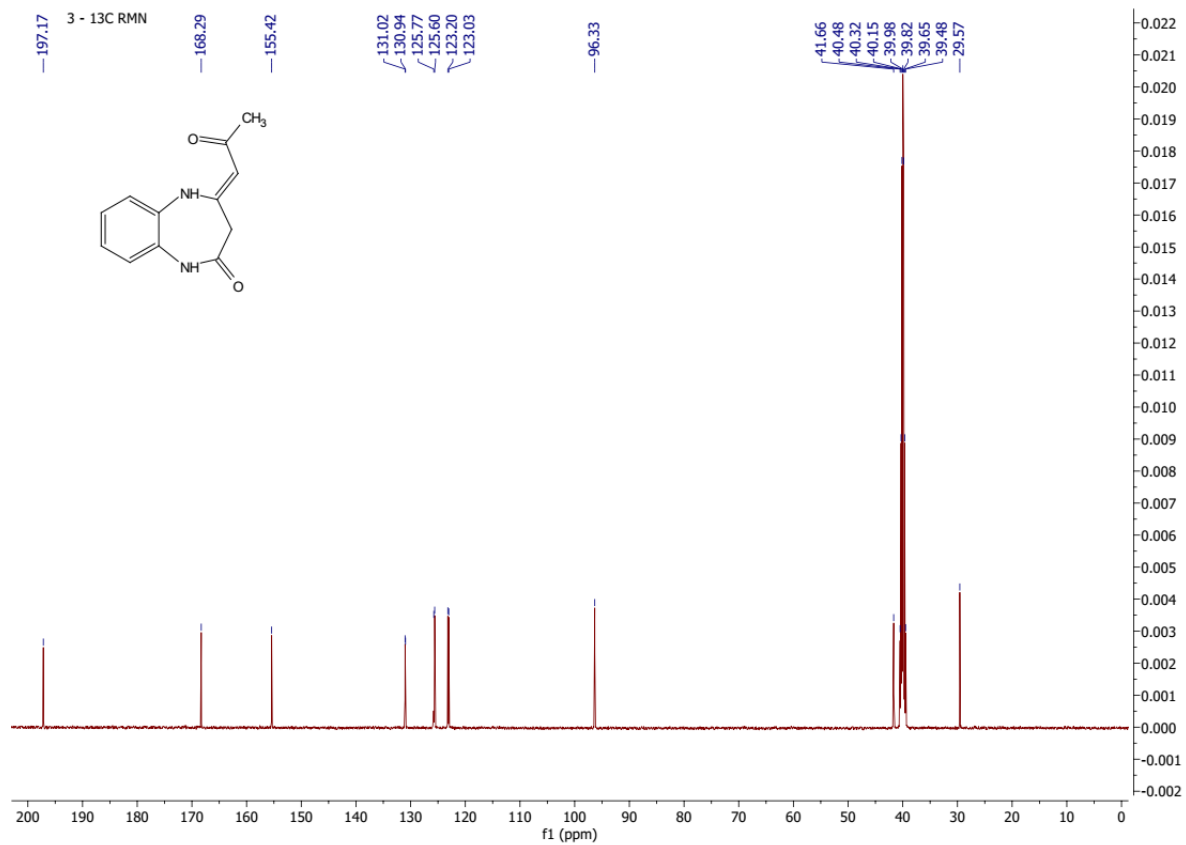

Figure S2. <sup>13</sup>C NMR spectrum of **3**.

3\_210531130729#1 RT: 0.01 AV: 1 NL: 2.63E8  
T: FTMS + p ESI Full ms [50.0000-350.0000]

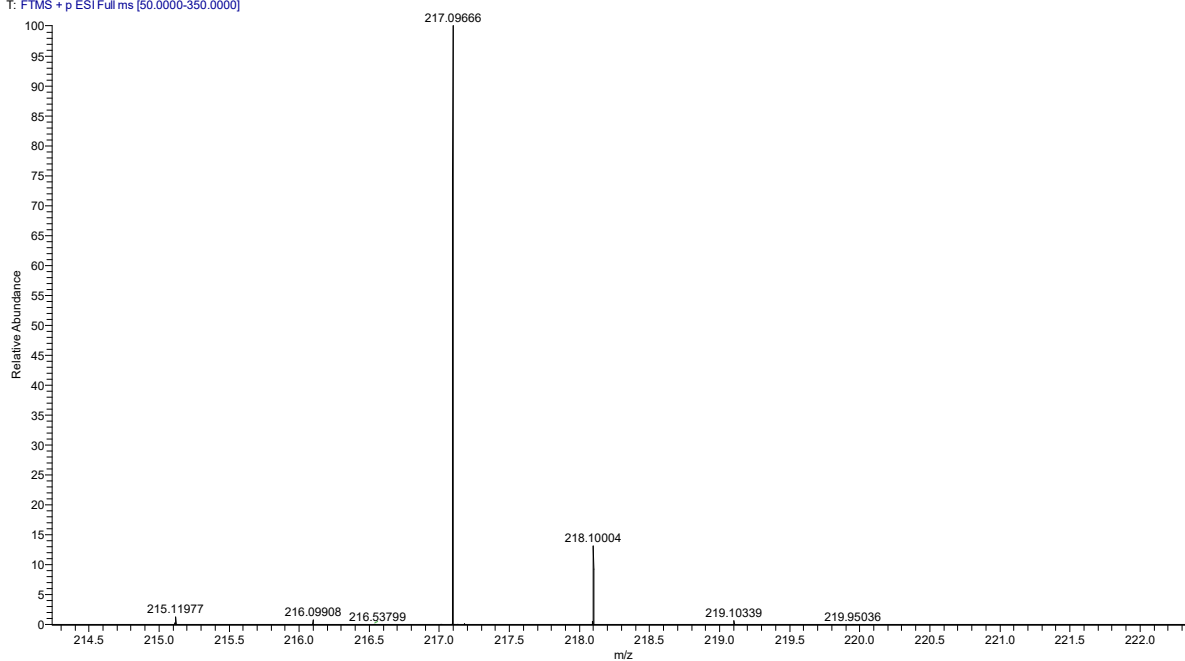

**Figure S3.** ESI-HRMS spectrum of **3**.

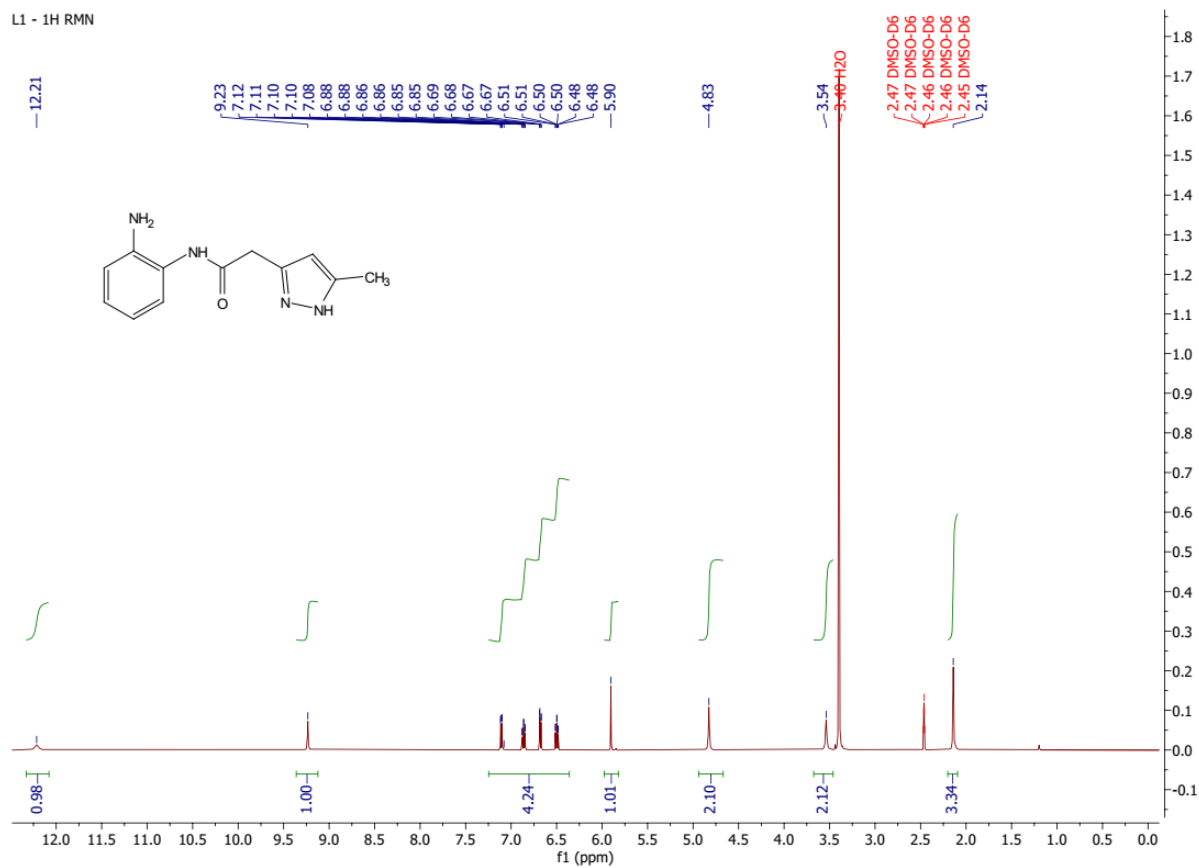

Figure S4. <sup>1</sup>H NMR spectrum of *L1*.

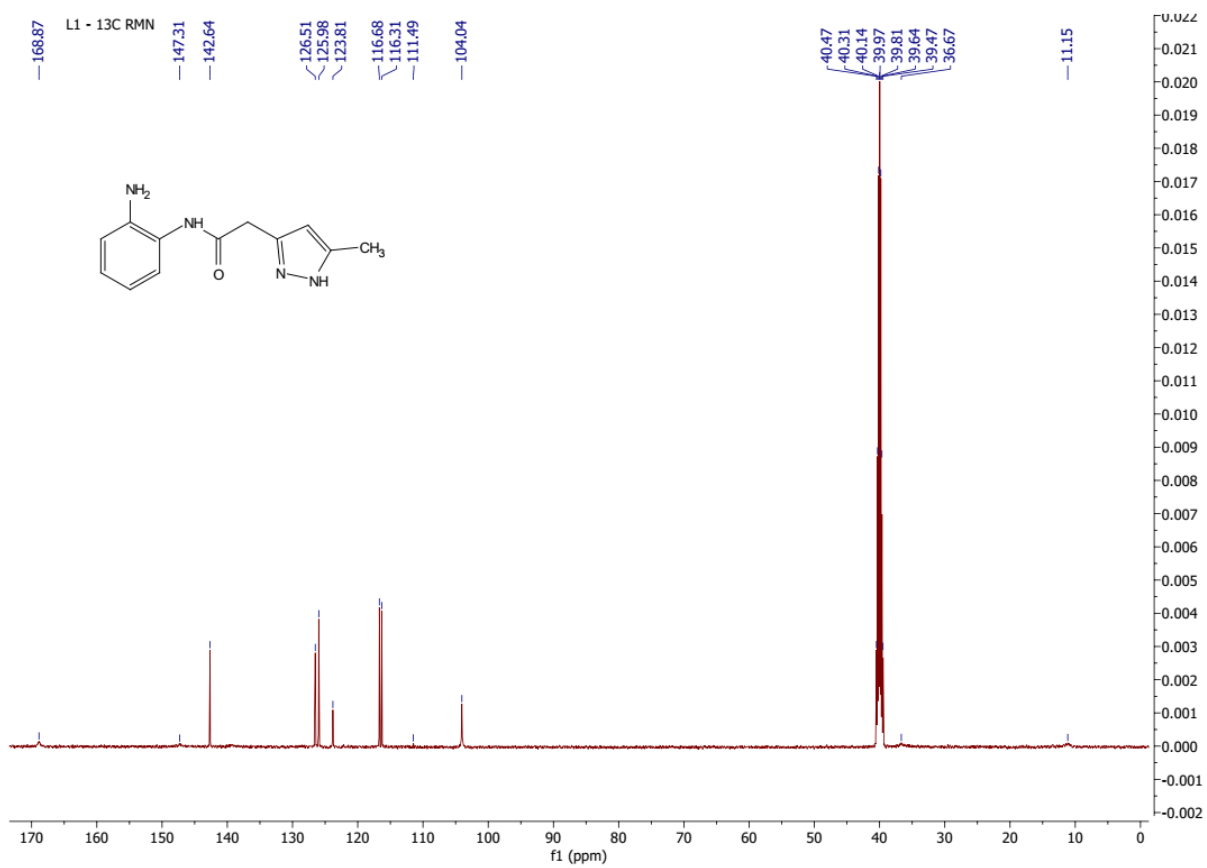

Figure S5.  $^{13}\text{C}$  NMR spectrum of *L1*.

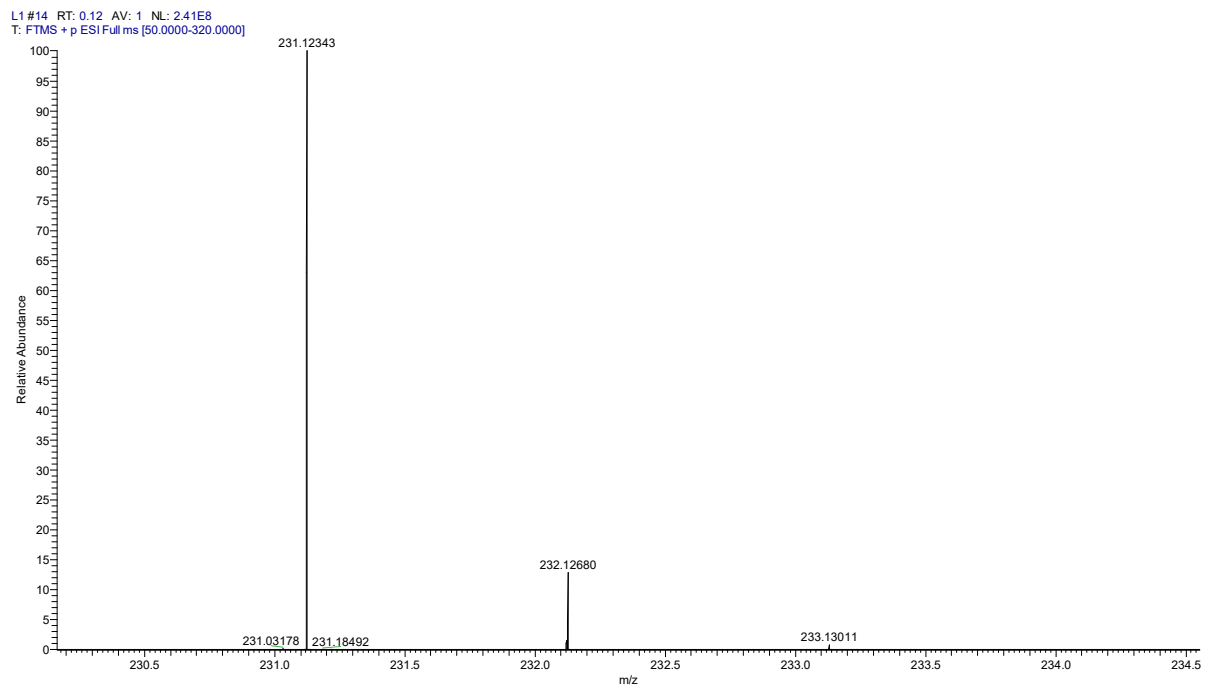

**Figure S6.** ESI-HRMS spectrum of *L1*.

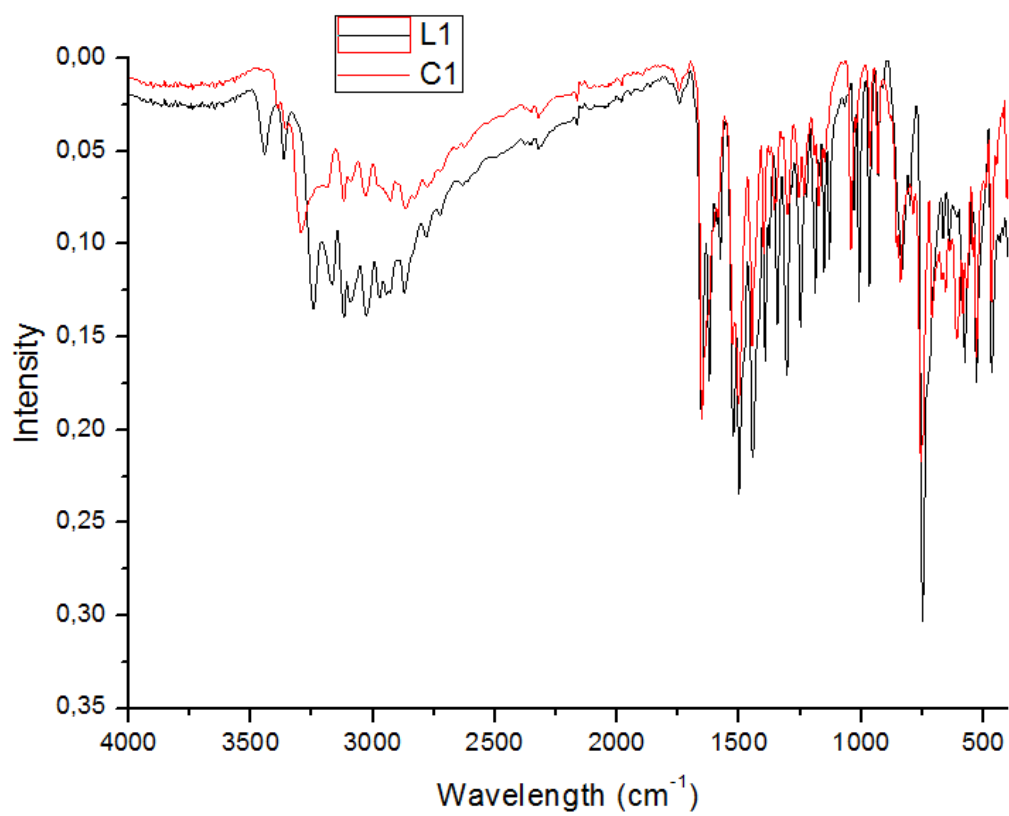

**Figure S7.** FT-IR comparison plot of  $C_I$  and  $L_I$ .



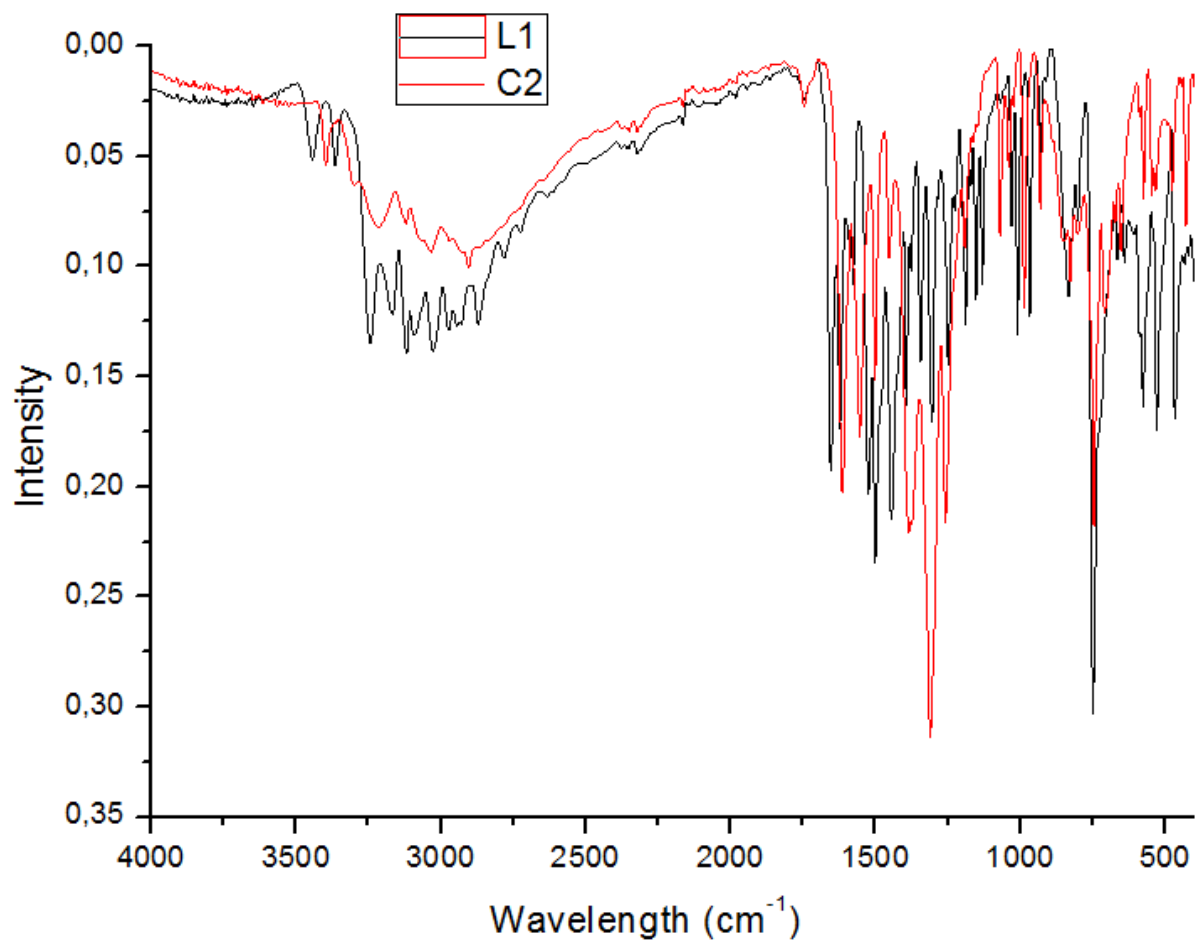

**Figure S8.** FT-IR comparison plot of  $C_2$  and  $L_1$ .

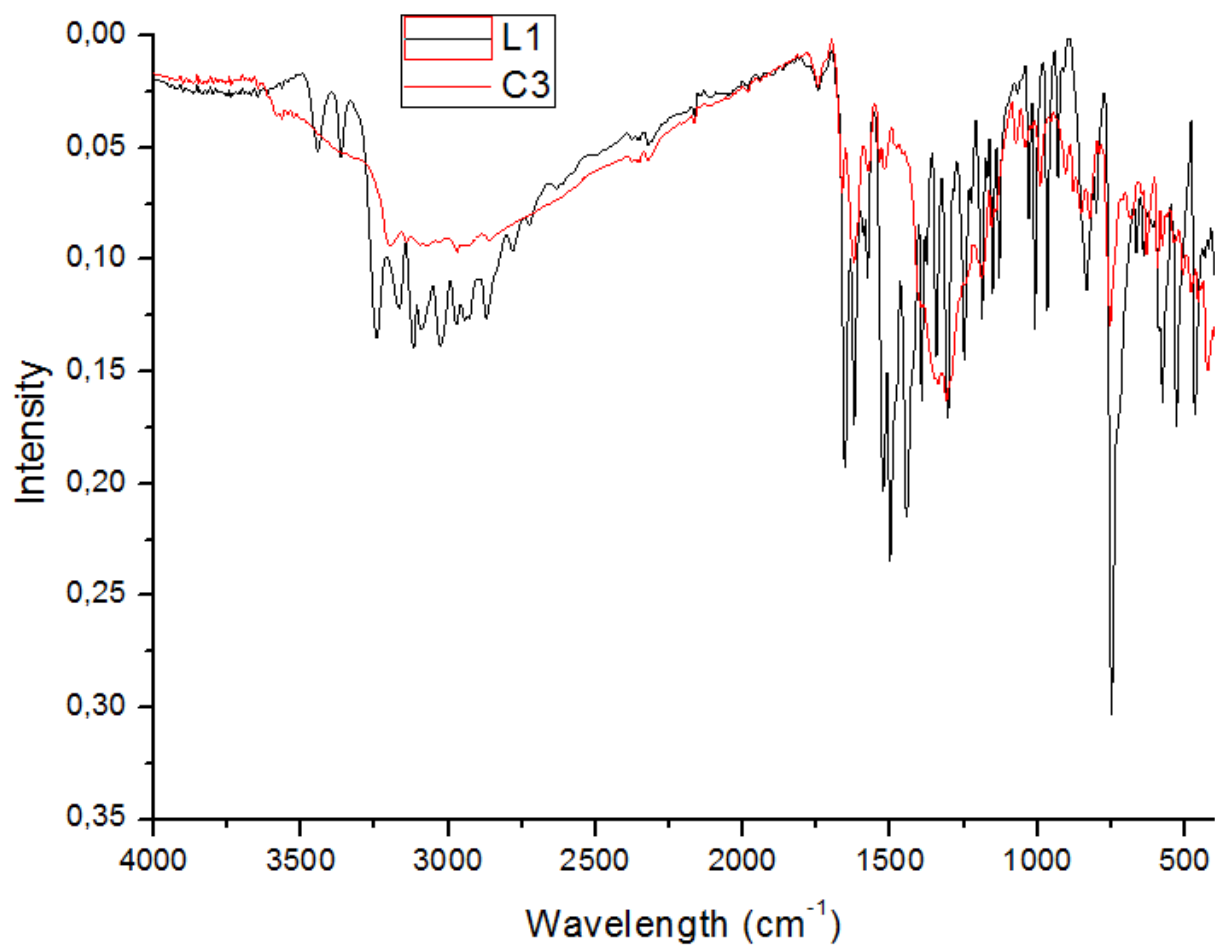

**Figure S9.** FT-IR comparison plot of  $C_3$  and  $L_1$ .

C1 #1 RT: 0.01 AV: 1 NL: 1.17E9  
T: FTMS + p ESI Fullms [450.0000-750.0000]

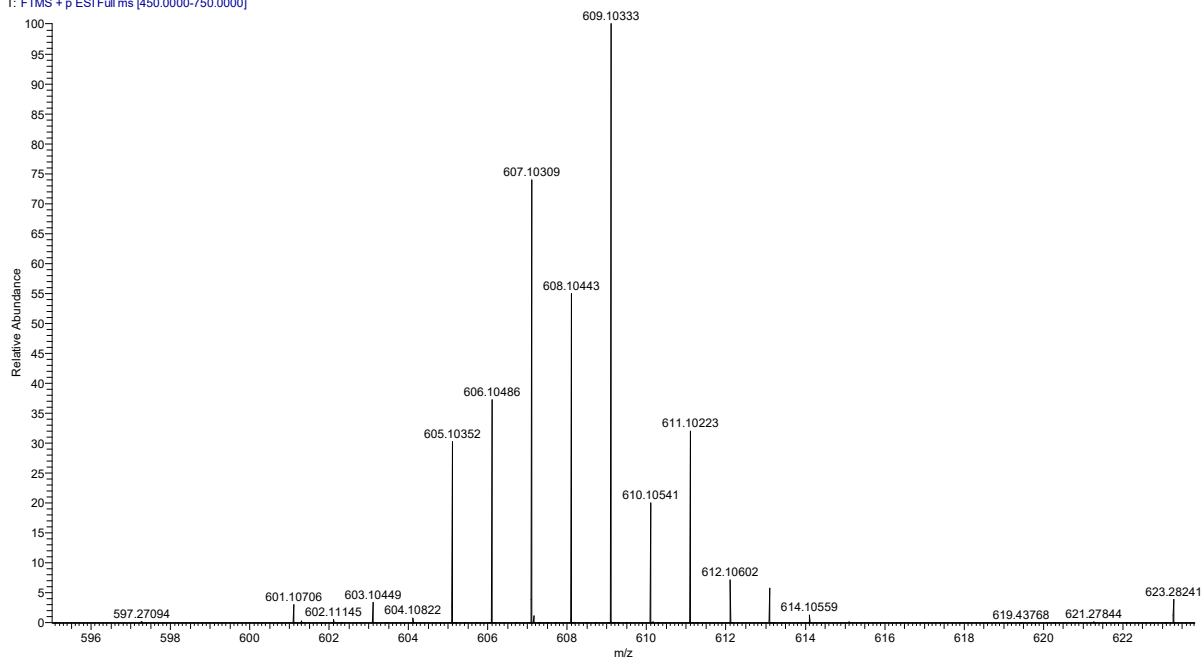

**Figure S10.** ESI-MS spectrum of  $C_1$ .

C2 #10 RT: 0.09 AV: 1 NL: 3.39E8  
T: FTMS + p ESI Full ms [600.0000-800.0000]

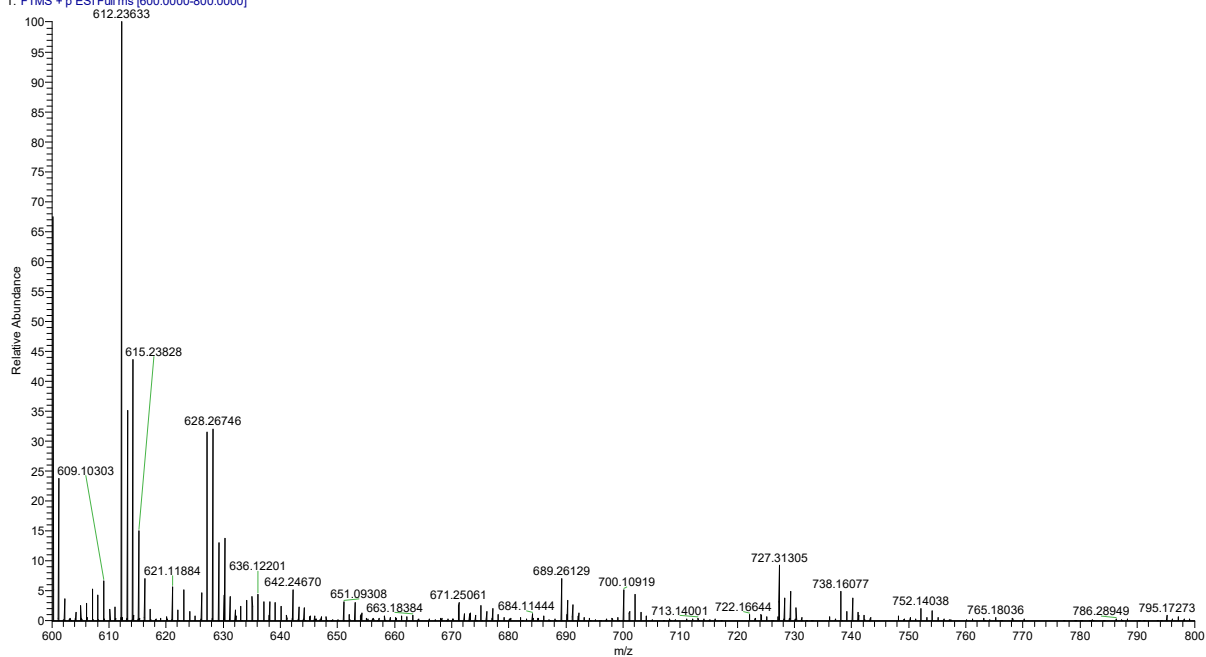

Figure S11. ESI-MS spectrum of  $C_2$ .

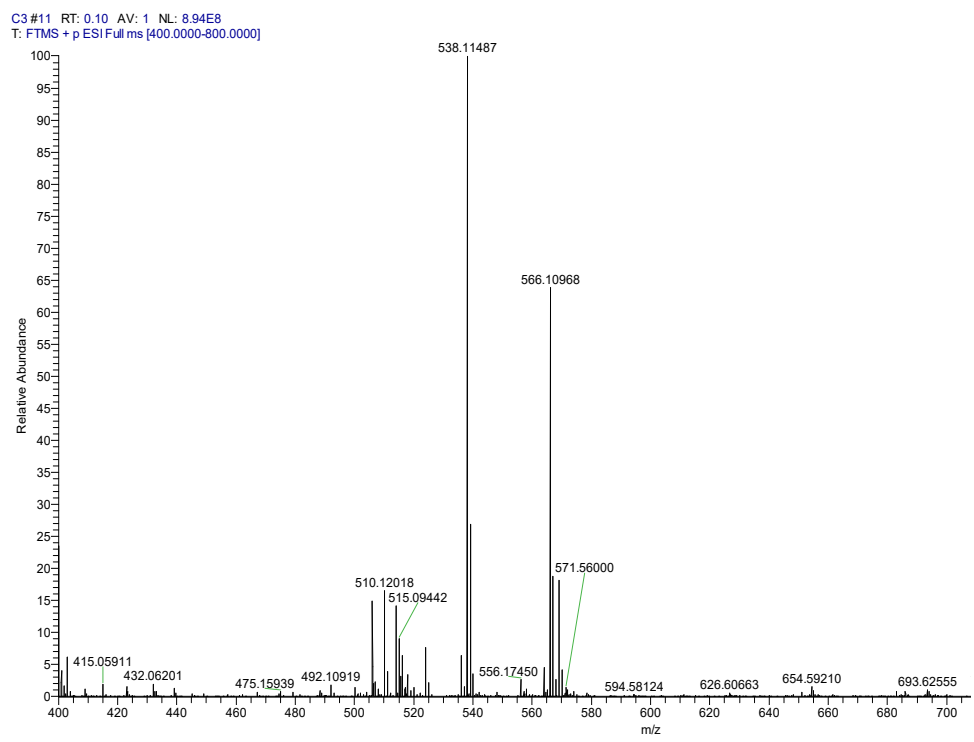

**Figure S12.** ESI-MS spectrum of  $C_3$ .

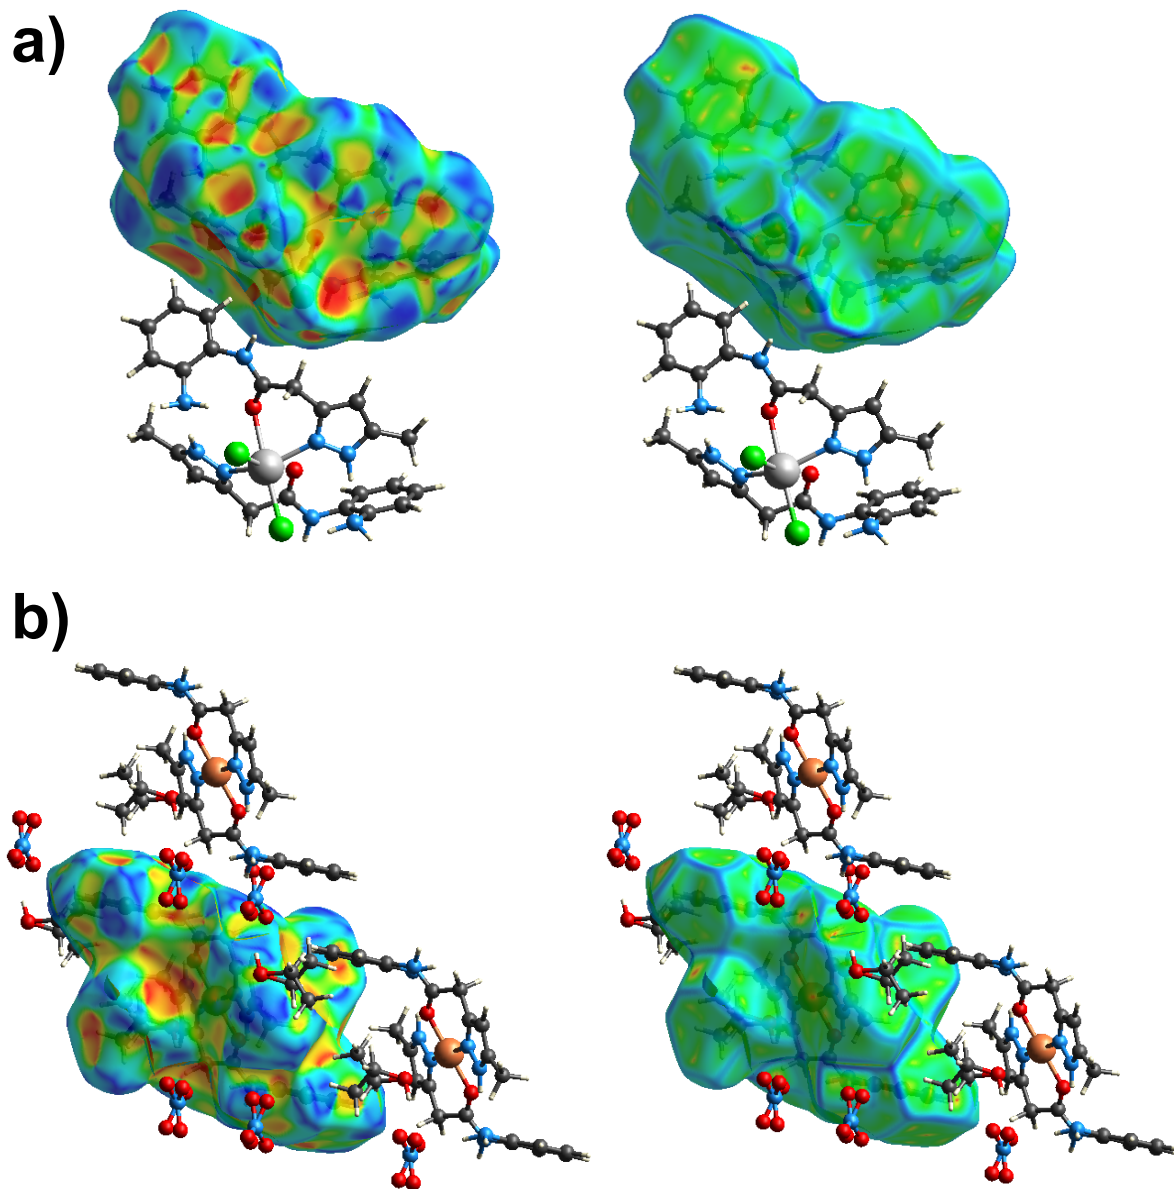

**Figure S13.** shape index (shown in left side) and curvedness (shown in right side) of  $C_1$  (a) and  $C_2$  (b).

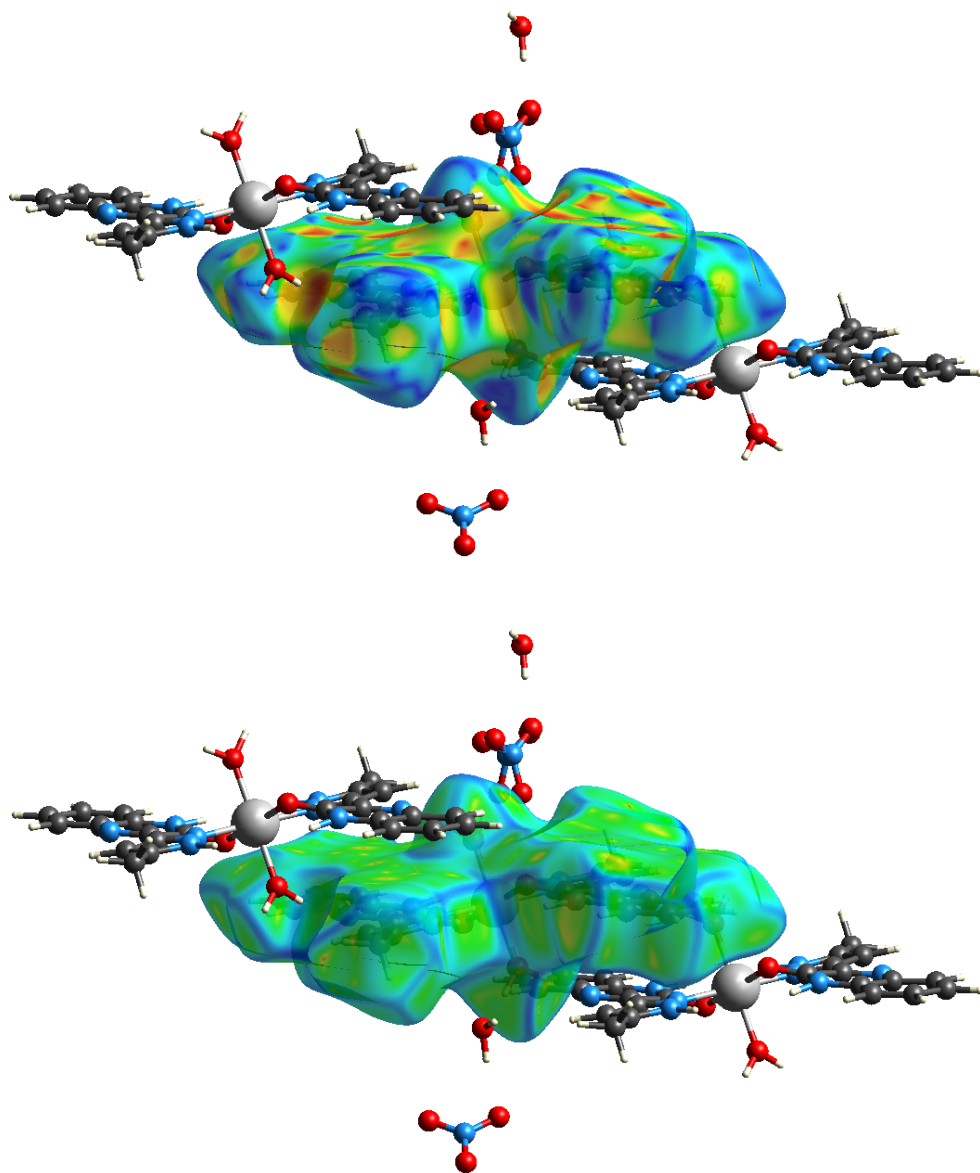

**Figure S14.** Shape index (*top*) and curvedness (*bottom*) of C<sub>3</sub>.

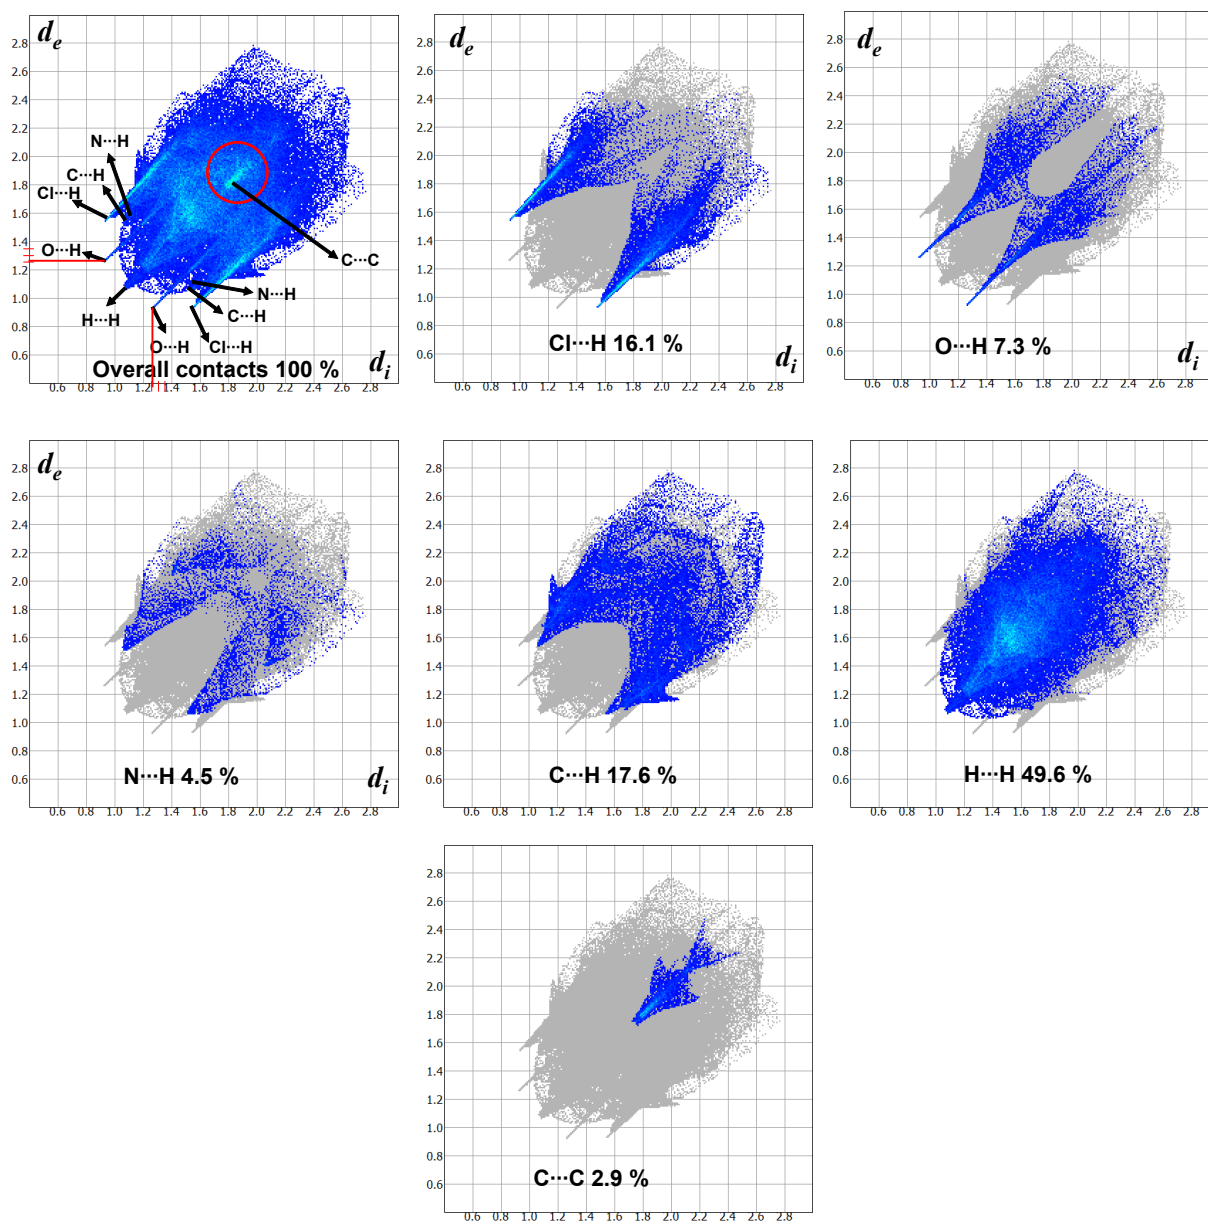

**Figure S15.** 2D Fingerprint plots derived from Hirshfeld surfaces, displaying various intermolecular interactions for  $C_1$ .



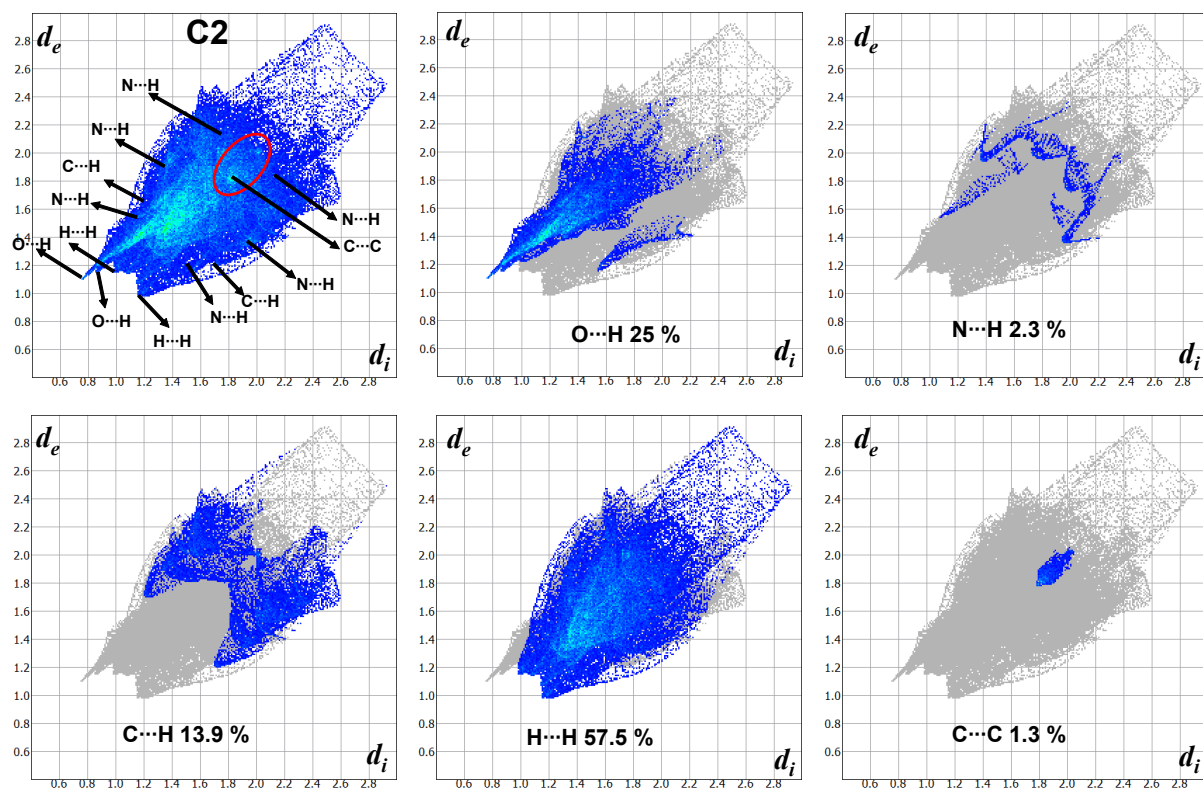

**Figure S16.** 2D Fingerprint plots derived from Hirshfeld surfaces, displaying various intermolecular interactions for  $C_2$ .

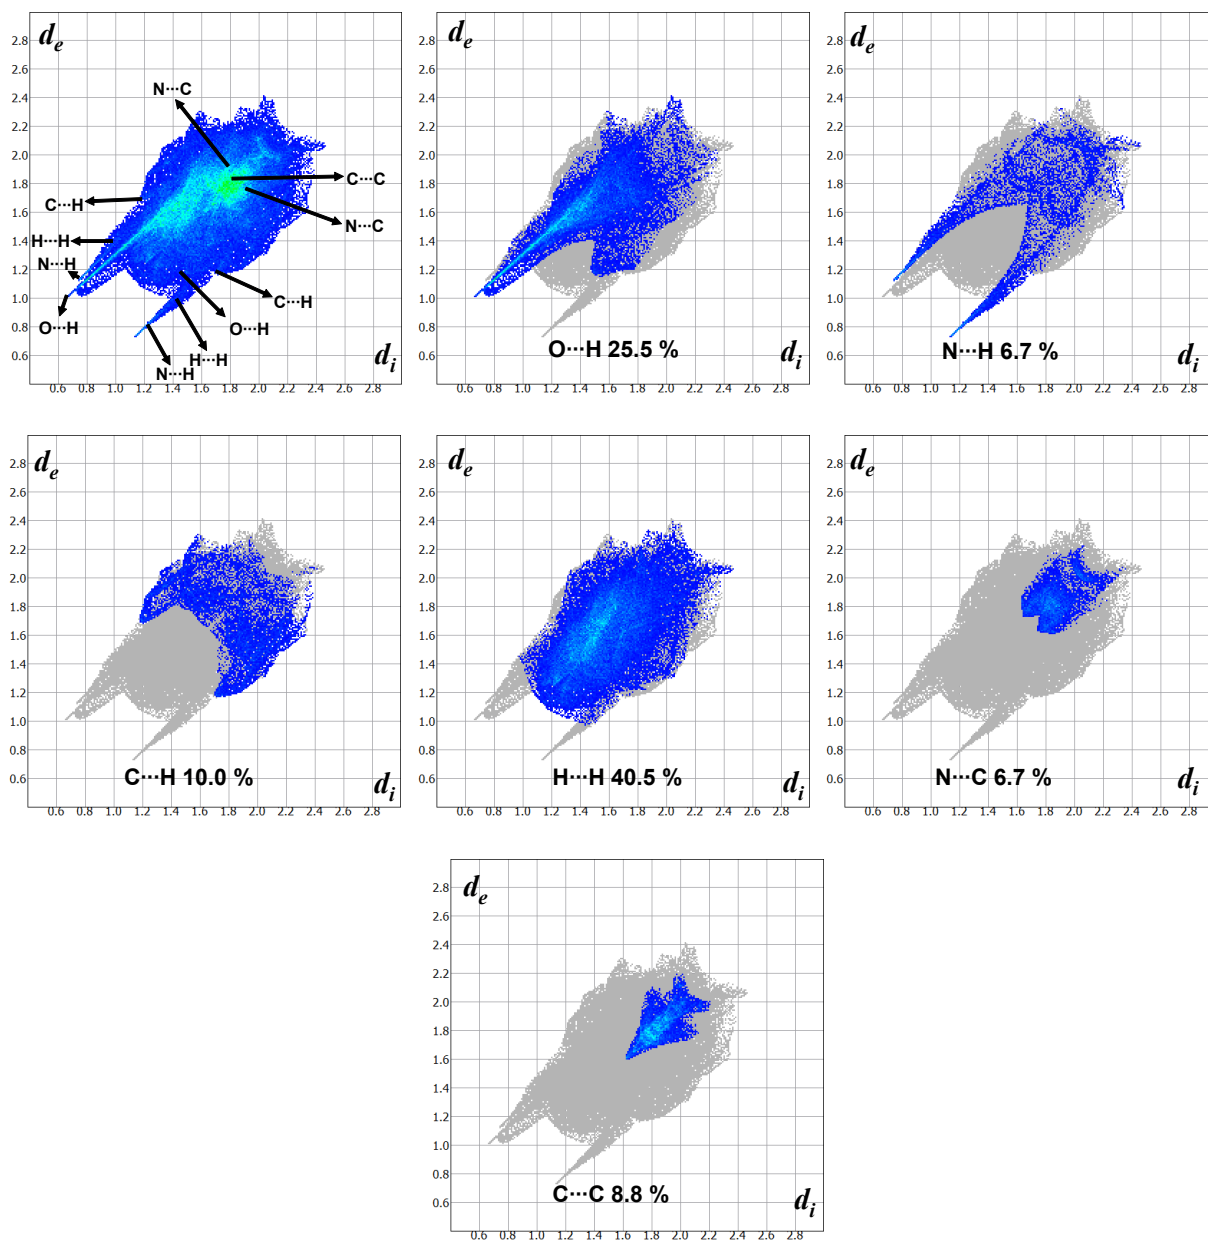

**Figure S17.** 2D Fingerprint plots derived from Hirshfeld surfaces, displaying various intermolecular interactions for  $C_3$ .
